# Supplementary material
Source: PubMed Central journal article supplement (PMC6629463)
Supplement: NIHMS1034036-supplement-Supplemental_data.pdf [file NIHMS1034036-supplement-Supplemental_data.pdf]

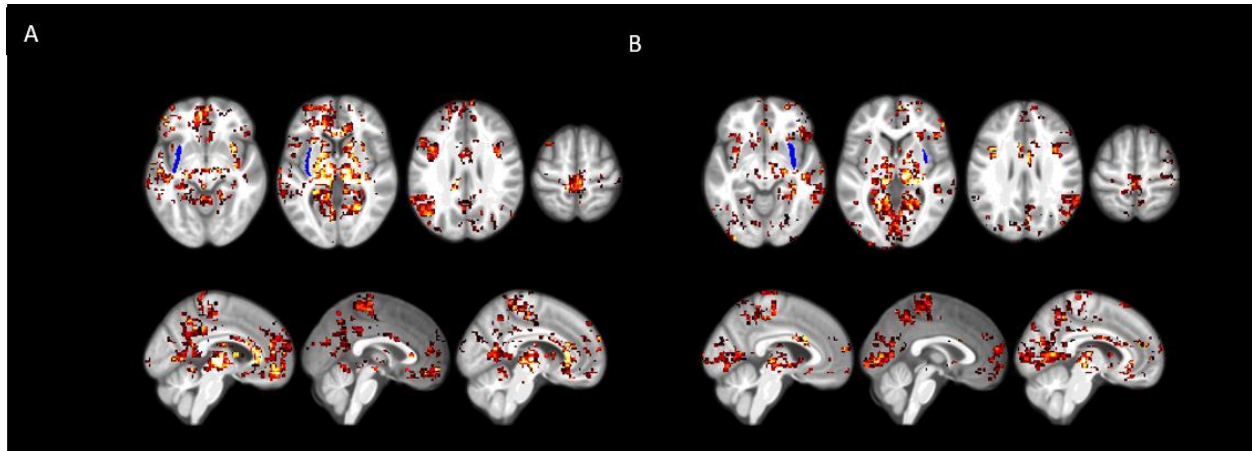

S1. Resting state connectivity of the left (A) and right (B) claustrum at 7T with 3mm FWHM smoothing kernel. Data were voxel wise thresholded at  $p < 0.001$  followed by FWE cluster correction. Blue ROI in A-D represents an average claustrum dilated by 1.5 mm (for visualization only).

**Table S1:** L Claustrum Functional Connectivity with Insula and Putamen Removed *7T-Rest*

| Label                                | Side | x   | y   | z   | Peak T-value | Cluster p-value (FWE-corr) | Cluster size (voxels) |
|--------------------------------------|------|-----|-----|-----|--------------|----------------------------|-----------------------|
| Clastrum                             | L    | -36 | -10 | -2  | 24.06395531  | <0.001                     | 59201                 |
|                                      |      | -32 | 4   | -6  | 18.89156532  |                            |                       |
|                                      |      | -34 | 2   | -4  | 18.54368019  |                            |                       |
|                                      |      | -28 | 8   | -10 | 17.50679398  |                            |                       |
| Thalamus (Ventral Lateral)           | L    | -10 | -14 | 2   | 15.17824364  |                            |                       |
| Thalamus (Ventral Posterior Lateral) | L    | -16 | -20 | 0   | 15.15515137  |                            |                       |
|                                      | R    | 8   | -14 | -6  | 13.77011967  |                            |                       |
|                                      | R    | 12  | -14 | -2  | 13.30285454  |                            |                       |
| Thalamus (Pulvinar)                  | R    | 12  | -26 | 2   | 12.7253046   |                            |                       |
|                                      | L    | -12 | -30 | 0   | 12.51099586  |                            |                       |
| Subgenual Anterior Cingulate Cortex  | R    | 4   | 20  | -8  | 12.19818401  |                            |                       |
| Thalamus (Ventral Posterior Lateral) | R    | 24  | -26 | 2   | 12.0723753   |                            |                       |
| Hippocampus                          | L    | -32 | -18 | -16 | 11.83692551  |                            |                       |
|                                      |      | -28 | -8  | -24 | 11.55429554  |                            |                       |
| Subgenual Anterior Cingulate Cortex  | L    | -6  | 24  | -6  | 11.44417858  |                            |                       |
| Thalamus (Pulvinar)                  | R    | 18  | -28 | 4   | 11.17559147  |                            |                       |
| Clastrum                             | L    | -32 | -24 | 2   | 10.87742901  |                            |                       |
| Thalamus (Pulvinar)                  | R    | 14  | -24 | 10  | 10.73503971  |                            |                       |
| Clastrum                             | L    | -30 | -26 | 6   | 10.67422676  |                            |                       |
| Clastrum                             | R    | 32  | 10  | -8  | 10.39802837  |                            |                       |
| Anterior Mid Cingulate Cortex        | L    | -6  | 24  | 18  | 10.3722086   |                            |                       |
| Thalamus (Ventral Posterior Lateral) | R    | 22  | -20 | 2   | 10.27667427  |                            |                       |
| Subgenual Anterior Cingulate Cortex  | L    | -4  | 26  | 0   | 10.12805939  |                            |                       |
| Ventral Medial Prefrontal Cortex     | L    | -8  | 48  | -12 | 9.763479233  |                            |                       |
| Pregenual Anterior Cingulate Cortex  | L    | -2  | 28  | 6   | 9.756249428  |                            |                       |
| Nucleus Accumbens                    | L    | -16 | 12  | 8   | 9.620131493  |                            |                       |
| Thalamus (Ventral Posterior Lateral) | R    | 20  | -16 | 4   | 9.616638184  |                            |                       |

|                                     |   |     |     |     |             |        |     |
|-------------------------------------|---|-----|-----|-----|-------------|--------|-----|
| Nucleus Accumbens                   | R | 16  | 12  | 8   | 9.511778831 |        |     |
|                                     | L | -12 | 10  | 10  | 9.502311707 |        |     |
| Anterior Mid Cingulate Cortex       | R | 10  | 30  | 16  | 9.352282524 |        |     |
| Nucleus Accumbens                   | L | -16 | 8   | 6   | 9.338762283 |        |     |
| Hippocampus                         | L | -22 | -12 | -24 | 9.333524704 |        |     |
| Ventral Posterior Cingulate Cortex  | L | -14 | -48 | 6   | 9.283568382 |        |     |
| Nucleus Accumbens                   | R | 16  | 14  | 4   | 9.234643936 |        |     |
| Superior Temporal Gyrus             | R | 38  | -28 | 10  | 9.170275688 |        |     |
| Clastrum                            | R | 28  | 14  | -10 | 9.090922356 |        |     |
| Hippocampus                         | L | -28 | -16 | -22 | 9.072501183 |        |     |
| Pregenual Anterior Cingulate Cortex | L | -8  | 28  | 8   | 9.004393578 |        |     |
| Globus Pallidus Internal            | L | -14 | 0   | 2   | 8.981911659 |        |     |
| Hippocampus                         | L | -28 | -30 | -12 | 8.873837471 |        |     |
| Pregenual Anterior Cingulate Cortex | L | -10 | 30  | 6   | 8.869677544 |        |     |
| Superior Temporal Sulcus            | L | -42 | -34 | -2  | 8.849382401 |        |     |
| Ventral Lateral Prefrontal Cortex   | L | -32 | 24  | -16 | 8.767841339 |        |     |
| Medial Prefrontal Cortex            | L | -8  | 62  | 12  | 8.754950523 |        |     |
| Ventral Lateral Prefrontal Cortex   | R | 38  | 28  | -14 | 8.723095894 |        |     |
| Medial Prefrontal Cortex            | L | -6  | 42  | -6  | 8.706986427 |        |     |
| Hippocampus                         | R | 34  | -24 | 2   | 8.703000069 |        |     |
| Superior Temporal Gyrus             | L | -52 | -14 | -8  | 8.632119179 |        |     |
| Globus Pallidus Internal            | R | 16  | 0   | 0   | 8.559850693 |        |     |
| Posterior Parietal Cortex           | L | -38 | -68 | 34  | 8.395782471 |        |     |
| Medial Prefrontal Cortex            | R | 16  | 56  | 0   | 8.355535507 |        |     |
| Hippocampus                         | R | 22  | -14 | -20 | 8.251626968 |        |     |
| Putamen                             | R | 18  | 4   | 4   | 8.233177185 |        |     |
| Superior Temporal Gyrus             | R | 44  | -30 | 8   | 8.177122116 |        |     |
| Hippocampus                         | R | 30  | -8  | -26 | 8.175160408 |        |     |
|                                     |   | 22  | -10 | -14 | 8.162754059 |        |     |
| Hippocampus                         | L | -22 | -38 | -2  | 8.059206963 |        |     |
|                                     | R | 12  | -36 | 2   | 8.026491165 |        |     |
|                                     | R | 26  | -12 | -24 | 7.996898174 |        |     |
| Pons                                | L | -12 | -24 | -28 | 6.302366734 | <0.001 | 271 |
|                                     | R | 8   | -26 | -24 | 5.374338627 |        |     |
|                                     | R | 12  | -24 | -28 | 5.366235733 |        |     |
|                                     |   | 0   | -24 | -32 | 4.730604649 |        |     |
|                                     | R | 6   | -24 | -32 | 4.504598141 |        |     |

|  |   |    |     |     |             |  |  |
|--|---|----|-----|-----|-------------|--|--|
|  | R | 12 | -30 | -32 | 3.911982298 |  |  |
|--|---|----|-----|-----|-------------|--|--|

**Table S2:** R Claustrum Functional Connectivity with Insula and Putamen Removed *7T-Rest*

| Label                                   | Side | x   | y   | z   | Peak T-value | Cluster p-value (FWE-corr) | Cluster size (voxels) |
|-----------------------------------------|------|-----|-----|-----|--------------|----------------------------|-----------------------|
| Clastrum                                | R    | 32  | 4   | 0   | 25.29956818  | <0.001                     | 54354                 |
|                                         |      | 34  | -2  | -4  | 24.39122009  |                            |                       |
|                                         |      | 32  | 10  | -4  | 24.08267593  |                            |                       |
|                                         |      | 36  | -8  | -4  | 21.42823601  |                            |                       |
|                                         | L    | -30 | 6   | -12 | 12.57529163  |                            |                       |
| Thalamus (Pulvinar)                     | R    | 22  | -26 | 8   | 11.84923267  |                            |                       |
|                                         |      | 10  | -24 | 2   | 11.27258396  |                            |                       |
|                                         |      | 24  | -26 | 2   | 11.08607292  |                            |                       |
| Thalamus (Ventral Posterior Lateral)    | R    | 16  | -18 | -4  | 10.74502373  |                            |                       |
| Thalamus (Anterior Nucleus)             | L    | -12 | -2  | 2   | 10.71705818  |                            |                       |
| Thalamus (Ventral Posterior Lateral)    | R    | 14  | -18 | 0   | 10.65793514  |                            |                       |
| Midbrain                                | R    | 16  | -22 | -4  | 10.55012035  |                            |                       |
| Thalamus (Ventral Lateral)              | R    | 12  | -20 | 4   | 10.48565769  |                            |                       |
| Posterior Mid Anterior Cingulate Cortex | R    | 4   | 14  | 24  | 10.48087025  |                            |                       |
| Ventral Posterior Cingulate Cortex      | L    | -20 | -56 | 6   | 9.868988037  |                            |                       |
| Middle Frontal Gyrus                    | R    | 36  | 6   | 28  | 9.627185822  |                            |                       |
| Clastrum                                | R    | 32  | -18 | 14  | 9.588145256  |                            |                       |
| Thalamus (Pulvinar)                     | R    | 16  | -24 | 10  | 9.451543808  |                            |                       |
| Superior Temporal Sulcus                | R    | 48  | -24 | -6  | 9.438153267  |                            |                       |
| Anterior Mid Cingulate Cortex           | L    | -4  | 14  | 24  | 9.348632813  |                            |                       |
| Hippocampus                             | R    | 30  | -10 | -22 | 9.246312141  |                            |                       |
| Globs Pallidus Internal                 | R    | 22  | -8  | 4   | 9.188798904  |                            |                       |
| Hippocampus                             | R    | 28  | -32 | -8  | 9.179620743  |                            |                       |
|                                         |      | 24  | -6  | -26 | 9.112071991  |                            |                       |
| Middle Frontal Gyrus                    | R    | 40  | 2   | 28  | 8.969317436  |                            |                       |
| Ventral Posterior Cingulate Cortex      | R    | 16  | -46 | -2  | 8.960434914  |                            |                       |

|                                     |   |     |     |     |             |  |  |
|-------------------------------------|---|-----|-----|-----|-------------|--|--|
| Thalamus (Pulvinar)                 | L | -20 | -26 | 10  | 8.903382301 |  |  |
| Ventral Lateral Prefrontal Cortex   | R | 44  | 54  | -6  | 8.849404335 |  |  |
| Angular Gyrus                       | R | 52  | -68 | 28  | 8.766235352 |  |  |
| Ventral Posterior Cingulate Cortex  | L | -22 | -62 | 6   | 8.74567318  |  |  |
| Globus Pallidus                     | R | 14  | -2  | 2   | 8.73133564  |  |  |
| Ventral Posterior Cingulate Cortex  | R | 20  | -58 | 4   | 8.700037003 |  |  |
| Midbrain                            | L | -16 | -22 | -4  | 8.589623451 |  |  |
| Inferior Frontal Gyrus              | R | 50  | 24  | -2  | 8.497831345 |  |  |
| Clastrum                            | L | -28 | 18  | 0   | 8.464349747 |  |  |
| Middle Temporal Sulcus              | R | 58  | -50 | -8  | 8.456132889 |  |  |
| Orbital Gyrus                       | R | 26  | 12  | -20 | 8.423750877 |  |  |
| Middle Temporal Sulcus              | R | 56  | -48 | -10 | 8.399514198 |  |  |
| Dorsal Lateral Prefrontal Cortex    | R | 48  | 18  | 40  | 8.394253731 |  |  |
| Ventral Lateral Prefrontal Cortex   | R | 44  | 34  | -8  | 8.315858841 |  |  |
| Dorsal Lateral Prefrontal Cortex    | R | 52  | 16  | 42  | 8.29859066  |  |  |
| Temporo-Parietal Junction           | R | 52  | -46 | 24  | 8.266856194 |  |  |
| Posterior Mid Cingulate Cortex      | R | 14  | 16  | 26  | 8.183446884 |  |  |
| Dorsal Premotor Cortex              | R | 42  | 4   | 48  | 8.14260006  |  |  |
| Ventral Lateral Prefrontal Cortex   | R | 28  | 22  | -18 | 8.124418259 |  |  |
| Anterior Mid Cingulate Cortex       | R | 10  | 18  | 24  | 8.102245331 |  |  |
| Clastrum                            | R | 28  | -24 | 16  | 8.07894516  |  |  |
| Hippocampus                         | L | -26 | -20 | -24 | 8.072444916 |  |  |
|                                     |   | -26 | -24 | -20 | 8.072433472 |  |  |
|                                     |   | -22 | -14 | -24 | 8.022881508 |  |  |
| Thalamus (Ventral Lateral)          | R | 18  | -16 | 8   | 8.013230324 |  |  |
| Middle Temporal Gyrus               | R | 60  | -36 | -4  | 7.854027271 |  |  |
| Thalamus (Pulvinar)                 | L | -12 | -30 | 4   | 7.803732872 |  |  |
| Ventral Lateral Prefrontal Cortex   | R | 46  | 32  | -2  | 7.759963036 |  |  |
| Midbrain                            | L | -10 | -18 | -2  | 7.750605583 |  |  |
| Subgenual Anterior Cingulate Cortex | L | -10 | 14  | -12 | 7.735712528 |  |  |
| Cuneus                              | L | -8  | -66 | 6   | 7.730248451 |  |  |
| Nucleus Accumbens                   | R | 14  | 20  | -4  | 7.70498848  |  |  |

|                                      |   |     |     |     |             |        |     |
|--------------------------------------|---|-----|-----|-----|-------------|--------|-----|
| Thalamus (Ventral Lateral Posterior) | L | -8  | -24 | 0   | 7.70159626  |        |     |
| Orbital Gyrus                        | R | 32  | 18  | -22 | 7.641664028 |        |     |
| Fusiform Gyrus                       | R | 40  | -46 | -20 | 7.527080059 |        |     |
| Ventral Posterior Cingulate Cortex   | R | 20  | -52 | 8   | 7.49554348  |        |     |
| Thalamus (Medial Dorsal)             | L | -8  | -14 | 4   | 7.489756107 |        |     |
| Clastrum                             | R | 34  | 2   | -16 | 7.465096474 |        |     |
| Cuneus                               | R | 14  | -86 | 8   | 7.459712982 |        |     |
| Globus Pallidus                      | R | 18  | 2   | 2   | 7.441179752 |        |     |
| Dorsal Premotor Cortex               | R | 26  | 4   | 46  | 7.386868    |        |     |
| Ventral Lateral Prefrontal Cortex    | R | 26  | 54  | 4   | 7.323858261 |        |     |
| Dorsal Premotor Cortex               | L | -24 | -4  | 58  | 5.715116501 | <0.001 | 293 |
| Precentral Gyrus                     | L | -34 | -6  | 40  | 5.648714542 |        |     |
|                                      |   | -34 | -10 | 50  | 5.337987423 |        |     |
| Dorsal Premotor Cortex               | L | -24 | 2   | 48  | 4.654179096 |        |     |
| Precentral Gyrus                     | L | -30 | -12 | 42  | 4.555616856 |        |     |
| Dorsal Premotor Cortex               | L | -28 | -2  | 46  | 4.31825304  |        |     |
| Precentral Gyrus                     | L | -38 | -6  | 58  | 4.251635551 |        |     |
|                                      |   | -36 | -4  | 56  | 4.199534416 |        |     |
|                                      |   | -46 | -10 | 58  | 4.16604948  |        |     |
| Dorsal Lateral Prefrontal Cortex     | L | -20 | 12  | 50  | 3.741257429 |        |     |
| Postcentral Gyrus                    | L | -22 | -30 | 50  | 5.47414875  | <0.001 | 423 |
| Precentral gyrus                     | L | -24 | -24 | 54  | 5.470678329 |        |     |
| Postcentral Gyrus                    | L | -26 | -30 | 52  | 5.4689641   |        |     |
|                                      |   | -26 | -32 | 46  | 5.122312546 |        |     |
|                                      |   | -48 | -28 | 64  | 4.721522808 |        |     |
|                                      |   | -38 | -26 | 52  | 4.637797832 |        |     |
|                                      |   | -50 | -24 | 62  | 4.557812691 |        |     |
|                                      |   | -48 | -24 | 56  | 4.242319107 |        |     |
|                                      |   | -40 | -28 | 70  | 4.2090168   |        |     |
|                                      |   | -36 | -34 | 72  | 4.201920033 |        |     |
| Precentral Gyrus                     | L | -38 | -24 | 70  | 4.129280567 |        |     |
|                                      |   | -32 | -26 | 74  | 4.065063477 |        |     |
|                                      |   | -36 | -28 | 72  | 4.044534683 |        |     |
|                                      |   | -36 | -22 | 72  | 4.013090611 |        |     |
|                                      |   | -34 | -20 | 74  | 3.865483522 |        |     |
| Postcentral Gyrus                    | L | -34 | -26 | 46  | 3.837870598 |        |     |
|                                      |   | -32 | -20 | 66  | 3.770018816 |        |     |
|                                      |   | -26 | -28 | 62  | 3.714066982 |        |     |

| <b>Table S3: L Claustrum Functional Connectivity with Insula and Putamen Removed 3T-Rest</b> |      |     |     |    |              |                            |                       |
|----------------------------------------------------------------------------------------------|------|-----|-----|----|--------------|----------------------------|-----------------------|
| Label                                                                                        | Side | x   | y   | z  | Peak T-value | Cluster p-value (FWE-corr) | Cluster size (voxels) |
| Clastrum                                                                                     | L    | -36 | -8  | -4 | 27.57        | 1.82E-191                  | 58478                 |
|                                                                                              | L    | -30 | 4   | -6 | 26.43        |                            |                       |
| Superior Temporal Gyrus                                                                      | L    | -52 | -10 | 4  | 9.87         |                            |                       |
| Clastrum                                                                                     | R    | 36  | 2   | -8 | 9.47         |                            |                       |
| Thalamus (Pulvinar)                                                                          | L    | -18 | -26 | -2 | 9.02         |                            |                       |
| Inferior Frontal Gyrus                                                                       | L    | -32 | 30  | -8 | 8.93         |                            |                       |
| Central Sulcus                                                                               | L    | -36 | -18 | 44 | 8.78         |                            |                       |
| Precentral Gyrus                                                                             | L    | -48 | -6  | 48 | 8.38         |                            |                       |
| Clastrum                                                                                     | R    | 34  | 10  | -6 | 8.2          |                            |                       |
| Parahippocampal Gyrus/lingual gyrus                                                          | L    | -26 | -38 | -4 | 7.93         |                            |                       |
| Inferior Frontal Gyrus                                                                       | R    | 42  | 32  | -6 | 7.92         |                            |                       |
| Superior Temporal Gyrus                                                                      | L    | -48 | 4   | -4 | 7.91         |                            |                       |
| Supramarginal Gyrus                                                                          | L    | -44 | -74 | 16 | 7.88         |                            |                       |
| Globus Pallidus                                                                              | L    | -18 | 2   | 0  | 7.74         |                            |                       |
| Inferior Frontal Gyrus                                                                       | R    | 58  | 24  | 2  | 7.7          |                            |                       |
| Dorsal Premotor Cortex                                                                       | L    | -34 | 0   | 48 | 7.65         |                            |                       |
| Superior Temporal Gyrus                                                                      | R    | 58  | 0   | -4 | 7.6          |                            |                       |
| Parietal Operculum                                                                           | R    | 46  | -60 | 10 | 7.57         |                            |                       |
| Midbrain (Red Nucleus)                                                                       | L    | -4  | -16 | -4 | 7.48         |                            |                       |
| Paracentral Lobule/Dorsal Posterior Cingulate Cortex                                         | L    | -2  | -24 | 46 | 7.32         |                            |                       |
| Superior Temporal Gyrus                                                                      | R    | 58  | -12 | 6  | 7.31         |                            |                       |
| Ventrolateral Prefrontal Cortex                                                              | L    | -48 | 30  | -2 | 7.3          |                            |                       |
| Middle Temporal Gyrus                                                                        | L    | -58 | -44 | -4 | 7.29         |                            |                       |
| Precentral Sulcus                                                                            | L    | -42 | 2   | 50 | 7.28         |                            |                       |
| Precentral Gyrus                                                                             | R    | 54  | 0   | 40 | 7.27         |                            |                       |
| Intraparietal Sulcus                                                                         | R    | 22  | -52 | 58 | 7.23         |                            |                       |
| Postcentral gyrus                                                                            | L    | -48 | -16 | 46 | 7.2          |                            |                       |
| Supramarginal gyrus                                                                          | L    | -46 | -40 | 20 | 7.2          |                            |                       |
| Cuneus                                                                                       | R    | 14  | -88 | 26 | 7.08         |                            |                       |
| Fusiform Gyrus/ BA 37                                                                        | L    | -18 | -62 | 4  | 7.05         |                            |                       |
| Nucleus Accumbens                                                                            | R    | 8   | 6   | 4  | 7.01         |                            |                       |

|                                     |   |     |     |     |      |  |  |
|-------------------------------------|---|-----|-----|-----|------|--|--|
| Thalamus (Ventral Lateral)          | L | -12 | -10 | -6  | 7.01 |  |  |
| Posterior Mid Cingulate Cortex      | L | -8  | -12 | 38  | 6.92 |  |  |
| Middle Occipital Gyrus              | R | 16  | -92 | 14  | 6.89 |  |  |
| Superior Temporal Gyrus             | R | 50  | -30 | 14  | 6.86 |  |  |
| Middle Temporal Gyrus               | R | 44  | 8   | -34 | 6.82 |  |  |
| Middle Temporal Gyrus (BA 37)       | R | 54  | -68 | 6   | 6.79 |  |  |
|                                     | L | -54 | -50 | 4   | 6.79 |  |  |
| Precentral Gyrus                    | R | 40  | -6  | 44  | 6.76 |  |  |
| Dorsal Premotor Cortex              | L | -36 | 0   | 60  | 6.74 |  |  |
| Dorsal Premotor Cortex              | R | 46  | 0   | 50  | 6.68 |  |  |
| Middle Temporal Gyrus               | L | -54 | -64 | 6   | 6.67 |  |  |
| Superior Temporal Gyrus             | L | -58 | -20 | -2  | 6.66 |  |  |
| Globus Pallidus                     | L | -24 | -10 | 2   | 6.63 |  |  |
| Postcentral Gyrus                   | L | -60 | -16 | 16  | 6.58 |  |  |
| Superior Temporal Gyrus             | R | 62  | -4  | 8   | 6.57 |  |  |
| Parahippocampal Gyrus               | R | 28  | -36 | -6  | 6.55 |  |  |
| Thalamus (Ventral Posterior medial) | R | 6   | -14 | -2  | 6.53 |  |  |
| Inferior Frontal Gyrus              | L | -50 | 16  | 20  | 6.52 |  |  |
| Thalamus (Pulvinar)                 | R | 16  | -28 | 2   | 6.51 |  |  |
| Putamen                             | R | 24  | -4  | -34 | 6.51 |  |  |
| Precentral Gyrus                    | R | 46  | -18 | 40  | 6.49 |  |  |
| Central Lobule                      | L | -8  | 12  | 56  | 6.49 |  |  |
|                                     | L | -4  | 8   | 38  | 6.49 |  |  |
| Cuneus                              | R | 10  | -80 | 4   | 6.43 |  |  |
| Dorsal Premotor Cortex              | R | 42  | -4  | 60  | 6.43 |  |  |
| Precentral Gyrus                    | R | 34  | -26 | 6   | 6.42 |  |  |
| Dorsal Premotor Cortex              | L | -26 | -8  | 46  | 6.41 |  |  |
| Mid Insula                          | L | -48 | 8   | 6   | 6.39 |  |  |
| Ventrolateral Prefrontal Cortex     | L | -40 | 40  | -4  | 6.39 |  |  |
| Middle Temporal Gyrus               | R | 58  | -12 | 30  | 6.36 |  |  |
| Middle Frontal Gyrus                | L | -30 | 22  | 56  | 6.33 |  |  |
| Angular Gyrus                       | R | 48  | -76 | 12  | 6.32 |  |  |
|                                     | L | -48 | -68 | 12  | 6.32 |  |  |
| Parahippocampal Gyrus               | R | 24  | -40 | 2   | 6.3  |  |  |
| Precentral Gyrus                    | R | 54  | -10 | 42  | 6.3  |  |  |
| Ventrolateral Prefrontal Cortex     | R | 50  | 32  | -4  | 6.28 |  |  |
| Postcentral Gyrus                   | L | -50 | -14 | 24  | 6.27 |  |  |
| Precuneus                           | R | 6   | -48 | 60  | 6.24 |  |  |



|                                |   |     |     |     |      |          |     |
|--------------------------------|---|-----|-----|-----|------|----------|-----|
| Postcentral Gyrus              | R | 36  | -22 | 42  | 6.23 |          |     |
| Lingual Gyrus                  | L | -10 | -78 | -8  | 6.21 |          |     |
| Superior Frontal Gyrus         | L | -4  | 18  | 44  | 6.21 |          |     |
|                                | L | -2  | 6   | 56  | 6.21 |          |     |
| Dorsolateral Prefrontal Cortex | L | -8  | 56  | 28  | 5.5  | 9.00E-07 | 330 |
|                                | L | -14 | 48  | 24  | 4.9  |          |     |
|                                | L | -14 | 48  | 38  | 4.68 |          |     |
|                                | L | -12 | 62  | 14  | 3.99 |          |     |
|                                | L | -8  | 48  | 46  | 3.81 |          |     |
|                                | L | -14 | 42  | 32  | 3.71 |          |     |
| Middle Temporal Gyrus          | L | -44 | 8   | -32 | 4.9  | 0.000739 | 123 |
|                                | L | -46 | 20  | -30 | 4.22 |          |     |
|                                | L | -34 | 24  | -26 | 3.81 |          |     |
| Fusiform Gyrus/ BA 37          | R | 40  | -48 | -22 | 4.8  | 0.001144 | 112 |
|                                | R | 42  | -54 | -12 | 4.1  |          |     |
|                                | R | 50  | -48 | -14 | 4.05 |          |     |

**Table S4:** R Claustrum Functional Connectivity with Insula and Putamen Removed 3T-Rest

| Label                                       | Side | x   | y   | z   | Peak T-value | Cluster p-value (FWE-corr) | Cluster size (voxels) |
|---------------------------------------------|------|-----|-----|-----|--------------|----------------------------|-----------------------|
| Clastrum                                    | R    | 32  | 6   | -4  | 30.04        | <0.001                     | 54586                 |
|                                             | R    | 28  | 12  | -8  | 23.9         |                            |                       |
|                                             | L    | -32 | -20 | -4  | 9.7          |                            |                       |
| Dorsal Posterior Cingulate Cortex           | R    | 4   | -40 | 38  | 8.27         |                            |                       |
| Dorsolateral Prefrontal Cortex              | R    | 4   | 42  | 42  | 8.01         |                            |                       |
| Superior Temporal Gyrus (BA 22)             | L    | -60 | -4  | -2  | 7.73         |                            |                       |
| Pons                                        | R    | 6   | -28 | -40 | 7.56         |                            |                       |
| Precentral Gyrus (BA 6)                     | L    | -42 | -6  | 44  | 7.49         |                            |                       |
| Postcentral Gyrus                           | R    | 36  | -16 | 48  | 7.3          |                            |                       |
| Cerebellum (Tuber Cinereum)                 | L    | -32 | -68 | -38 | 7.23         |                            |                       |
| Superior Temporal Gyrus                     | R    | 52  | 10  | -10 | 7.19         |                            |                       |
| Midbrain/Ventral Posterior Lateral Thalamus | R    | 14  | -14 | -4  | 7.11         |                            |                       |
| Superior Temporal Gyrus                     | R    | 50  | -8  | -8  | 7.08         |                            |                       |
| Dorsolateral Prefrontal Cortex              | R    | 24  | 32  | 48  | 6.93         |                            |                       |
| Ventrolateral Prefrontal Cortex             | L    | -44 | 34  | -10 | 6.9          |                            |                       |
| Thalamus (Pulvinar)                         | L    | -16 | -30 | -2  | 6.83         |                            |                       |
| Clastrum                                    | L    | -32 | 0   | -10 | 6.8          |                            |                       |
| Supramarginal Gyrus                         | L    | -40 | -54 | 32  | 6.79         |                            |                       |
| Clastrum                                    | L    | -32 | 12  | 2   | 6.76         |                            |                       |
| Superior Temporal Gyrus                     | R    | 54  | 2   | -8  | 6.74         |                            |                       |
| Midbrain (Red Nucleus)                      | R    | 2   | -18 | 52  | 6.72         |                            |                       |
| Superior Temporal Gyrus (BA 38)             | R    | 46  | 18  | -14 | 6.71         |                            |                       |
| Parahippocampal Gyrus                       | R    | 30  | -38 | -6  | 6.68         |                            |                       |
|                                             | L    | -22 | -52 | 0   | 6.68         |                            |                       |
| Middle Occipital Gyrus                      | R    | 48  | -72 | -10 | 6.62         |                            |                       |
| Middle Temporal Gyrus                       | L    | -58 | -16 | -4  | 6.55         |                            |                       |
| Midbrain (Superior Colliculus)              | R    | 2   | -28 | 0   | 6.52         |                            |                       |

|                                       |   |     |     |     |      |  |  |
|---------------------------------------|---|-----|-----|-----|------|--|--|
| Ventrolateral Prefrontal Cortex       | R | 48  | 24  | -2  | 6.5  |  |  |
| Cuneus                                | L | -12 | -92 | 26  | 6.5  |  |  |
| Ventrolateral Prefrontal Cortex       | R | 50  | 24  | -10 | 6.48 |  |  |
| Angular Gyrus                         | R | 54  | -56 | 18  | 6.47 |  |  |
| Cerebellum                            | L | -6  | -46 | -42 | 6.47 |  |  |
| Precentral Gyrus                      | R | 44  | -10 | 46  | 6.46 |  |  |
| Nucleus Accumbens                     | L | -10 | 6   | 0   | 6.43 |  |  |
| Middle Temporal Gyrus                 | R | 52  | -42 | 4   | 6.42 |  |  |
| Fusiform Gyrus/ BA 37                 | L | -32 | -38 | -16 | 6.41 |  |  |
| Thalamus (Pulvinar)                   | R | 16  | -28 | -2  | 6.4  |  |  |
| Ventral Lateral Prefrontal Cortex     | L | -52 | 24  | 2   | 6.4  |  |  |
| Cuneus                                | R | 14  | -84 | 22  | 6.35 |  |  |
|                                       | L | -4  | -64 | 20  | 6.3  |  |  |
| Clastrum                              | L | -28 | 8   | -10 | 6.28 |  |  |
| Inferior Occipital Gyrus              | R | 40  | -72 | 0   | 6.26 |  |  |
| Superior Temporal Gyrus               | R | 54  | -18 | 6   | 6.26 |  |  |
| Cuneus                                | L | -6  | -74 | 24  | 6.24 |  |  |
| Anterior Insula                       | L | -32 | 24  | 2   | 6.23 |  |  |
| Middle Temporal Gyrus                 | R | 50  | 6   | -34 | 6.18 |  |  |
| Dorsal Lateral Prefrontal Cortex      | L | -16 | 38  | 40  | 6.15 |  |  |
| Fusiform Gyrus/ BA 37                 | L | -38 | -62 | -20 | 6.11 |  |  |
| Middle Temporal Gyrus (Temporal Pole) | R | 48  | 14  | -34 | 6.1  |  |  |
| Midbrain                              | L | -2  | -16 | -6  | 6.08 |  |  |
| Extrastriate Cortex (BA 19)           | L | -22 | -70 | -14 | 6.07 |  |  |
| Ventral Lateral Prefrontal Cortex     | R | 56  | 18  | 0   | 6.06 |  |  |
| Superior Temporal Sulcus              | R | 62  | -36 | 0   | 6.06 |  |  |
| Cerebellum                            | L | -14 | -48 | -50 | 6.04 |  |  |
| Cuneus                                | R | 6   | -76 | 2   | 6.04 |  |  |
| Supramarginal Gyrus                   | R | 50  | -56 | 26  | 6.02 |  |  |
| Precuneus                             | L | -6  | -58 | 50  | 6.02 |  |  |
| Pons                                  | R | 6   | -30 | -32 | 6.01 |  |  |
| Cuneus                                | L | -22 | -90 | 20  | 6    |  |  |
| Inferior Occipital gyrus              | L | -36 | -82 | -10 | 6    |  |  |
| Intraparietal Sulcus                  | R | 20  | -64 | 50  | 6    |  |  |
| Superior Frontal Sulcus               | R | 22  | 20  | 42  | 5.96 |  |  |
| Inferior Frontal Gyrus                | R | 52  | 26  | 8   | 5.96 |  |  |
| Middle Temporal Gyrus                 | L | -68 | -12 | -2  | 5.94 |  |  |

|                                  |   |     |     |     |      |  |  |
|----------------------------------|---|-----|-----|-----|------|--|--|
| Angular Gyrus                    | L | -46 | -64 | 18  | 5.92 |  |  |
| Lingual Gyrus                    | R | 26  | -74 | -10 | 5.91 |  |  |
| Dorsal Lateral Prefrontal Cortex | R | 12  | 34  | 46  | 5.9  |  |  |
| Lingual Gyrus                    | L | -4  | -72 | -2  | 5.89 |  |  |
| Cerebellum Posterior Lobe        | L | -40 | -72 | -30 | 5.89 |  |  |
| Middle Frontal Gyrus             | R | 26  | 40  | 34  | 5.84 |  |  |

| <b>Table S5: Difficult Block vs Tapping MSIT</b> |      |     |     |     |              |                            |                       |
|--------------------------------------------------|------|-----|-----|-----|--------------|----------------------------|-----------------------|
| Label                                            | Side | x   | y   | z   | Peak T-value | Cluster p-value (FWE-corr) | Cluster size (voxels) |
| <i>Activation</i>                                |      |     |     |     |              |                            |                       |
| Inferior Occipital Gyrus                         | R    | 28  | -88 | -6  | 13.15        | <0.001                     | 22669                 |
| Lingual Gyrus                                    | L    | -16 | -94 | -10 | 12.25        |                            |                       |
| Middle Occipital Gyrus                           | L    | -32 | -90 | 0   | 10.78        |                            |                       |
| Inferior Occipital Gyrus                         | L    | -36 | -84 | -6  | 10.31        |                            |                       |
| Dorsal Premotor Cortex                           | R    | 32  | 0   | 56  | 9.26         | <0.001                     | 2022                  |
| Superior Frontal Gyrus                           | R    | 2   | 14  | 48  | 8.78         |                            |                       |
|                                                  | L    | -2  | 6   | 56  | 7.59         |                            |                       |
|                                                  | L    | -6  | 12  | 48  | 7.37         |                            |                       |
| Dorsal Premotor Cortex                           | L    | -28 | 0   | 54  | 8.5          | <0.001                     | 2477                  |
| Inferior Frontal Gyrus                           | L    | -42 | 6   | 30  | 8.07         |                            |                       |
| Dorsal Premotor Cortex                           | L    | -24 | -4  | 62  | 7.44         |                            |                       |
| Inferior Frontal Gyrus                           | L    | -50 | 8   | 34  | 6.97         |                            |                       |
| Thalamus (Ventral Lateral)                       | L    | -18 | -16 | 16  | 7.52         | <0.001                     | 865                   |
|                                                  | L    | -18 | -8  | 20  | 5.73         |                            |                       |
| Putamen                                          | L    | -28 | -20 | 6   | 5.3          |                            |                       |
|                                                  | L    | -24 | 0   | 12  | 5.23         |                            |                       |
|                                                  | R    | 24  | -2  | 12  | 6.92         | <0.001                     | 919                   |
| Nucleus Accumbens                                | R    | 20  | -6  | 22  | 6.92         |                            |                       |

|                                   |     |     |      |     |      |        |       |
|-----------------------------------|-----|-----|------|-----|------|--------|-------|
|                                   | R   | 20  | 6    | 20  | 6.52 |        |       |
| Putamen                           | R   | 28  | -6   | 2   | 6.35 |        |       |
| Inferior Frontal Gyrus            | R   | 46  | 10   | 28  | 6.61 | <0.001 | 395   |
| Orbitofrontal Gyrus               | R   | 26  | 56   | -16 | 5.48 | 0.015  | 129   |
|                                   | R   | 24  | 44   | -22 | 5.29 |        |       |
|                                   | R   | 20  | 64   | -14 | 3.4  |        |       |
| Midbrain                          | R   | 6   | -20  | -14 | 5.36 | 0.011  | 137   |
|                                   | L   | -6  | -28  | -14 | 4.58 |        |       |
| Anterior Insula                   | R   | 32  | 20   | 8   | 5.24 | 0.02   | 122   |
|                                   | R   | 30  | 32   | 2   | 3.84 |        |       |
| <i>Deactivation</i>               |     |     |      |     |      |        |       |
| Medial prefrontal cortex          | R/L | 0   | 30   | -14 | 8.97 | <0.001 | 10064 |
| Dorsal Lateral Prefrontal Cortex  | L   | -14 | 48   | 38  | 7.79 |        |       |
| Medial prefrontal cortex          | R   | 2   | 38   | -6  | 7.57 |        |       |
|                                   | L   | -4  | 44   | -8  | 7.41 |        |       |
| Temporal Parietal Junction        | L   | -62 | -62  | 16  | 8.55 | <0.001 | 3306  |
| Angular gyrus                     | L   | -44 | -80  | 32  | 8.14 |        |       |
|                                   | L   | -50 | -72  | 36  | 7.72 |        |       |
|                                   | L   | -34 | -86  | 38  | 7.14 |        |       |
| Middle Temporal Gyrus             | R   | 64  | -12  | -12 | 8.34 | <0.001 | 3858  |
|                                   | R   | 54  | -8   | -14 | 8.25 |        |       |
|                                   | R   | 48  | -62  | 10  | 7.56 |        |       |
| Angular Gyrus                     | R   | 48  | -76  | 34  | 7.27 |        |       |
| Dorsal Posterior Cingulate Cortex | L   | -2  | -42  | 40  | 7.78 | <0.001 | 3505  |
|                                   | R/L | 0   | -20  | 44  | 6.53 |        |       |
|                                   | R   | 2   | -28  | 42  | 6.46 |        |       |
|                                   | L   | -6  | -50  | 20  | 6.35 |        |       |
| Cerebellum (Pyramis)              | L   | -18 | -84  | -40 | 7.22 | <0.001 | 356   |
|                                   | L   | -34 | -82  | -44 | 3.41 |        |       |
| Cuneus                            | L   | -10 | -96  | 32  | 6.59 | 0.005  | 160   |
|                                   | L   | -10 | -102 | 20  | 6.15 |        |       |
| Orbitofrontal Gyrus               | L   | -28 | 30   | -12 | 6.36 | <0.001 | 251   |
|                                   | L   | -36 | 30   | -14 | 5.41 |        |       |
| Cerebellum (Tuber Cinereum)       | R   | 16  | -88  | -40 | 6.1  | <0.001 | 602   |
|                                   | R   | 38  | -74  | -36 | 4.88 |        |       |
|                                   | R   | 46  | -70  | -40 | 4.86 |        |       |
|                                   | R   | 26  | -78  | -32 | 4.67 |        |       |

|                             |   |     |     |     |      |        |     |
|-----------------------------|---|-----|-----|-----|------|--------|-----|
| Cerebellum (Posterior Lobe) | R | 6   | -48 | -44 | 5.82 | 0.007  | 148 |
|                             | L | -4  | -52 | -48 | 5.56 |        |     |
|                             | R | 4   | -50 | -52 | 4.78 |        |     |
| Temporal Pole               | R | 34  | 24  | -34 | 5.79 | <0.001 | 521 |
|                             | R | 42  | 16  | -34 | 5.33 |        |     |
|                             | R | 46  | 10  | -24 | 4.49 |        |     |
|                             | R | 36  | 14  | -26 | 4.42 |        |     |
| Cuneus                      | R | 18  | -96 | 28  | 5.18 | <0.001 | 278 |
|                             | R | 6   | -86 | 28  | 4.76 |        |     |
|                             | R | 16  | -82 | 30  | 4.32 |        |     |
|                             | R | 12  | -76 | 34  | 3.64 |        |     |
| Cerebellum (Pyramis)        | L | -46 | -66 | -42 | 5.1  | 0.002  | 179 |
|                             | L | -44 | -74 | -42 | 4.92 |        |     |
| Precentral Gyrus            | R | 16  | -34 | 70  | 5.07 | 0.006  | 154 |
|                             | R | 14  | -26 | 80  | 4.81 |        |     |
| Middle Temporal Gyrus       | L | -44 | 8   | -36 | 4.9  | 0.005  | 158 |
|                             | L | -44 | 0   | -38 | 4.72 |        |     |
|                             | L | -40 | 16  | -38 | 4.36 |        |     |

| <b>Table S6: Easy Block vs Tapping MSIT</b> |      |     |     |     |              |                            |                       |
|---------------------------------------------|------|-----|-----|-----|--------------|----------------------------|-----------------------|
| Label                                       | Side | x   | y   | z   | Peak T-value | Cluster p-value (FWE-corr) | Cluster size (voxels) |
| <i>Activation</i>                           |      |     |     |     |              |                            |                       |
| Cuneus                                      | L    | -20 | -94 | -4  | 10.79        | <0.001                     | 3081                  |
| Inferior Occipital Gyrus                    | L    | -34 | -84 | -8  | 8.55         |                            |                       |
| Middle Occipital Gyrus                      | L    | -40 | -66 | -16 | 6.72         |                            |                       |
| Cerebellum (Declive)                        | L    | -34 | -74 | -22 | 5.32         |                            |                       |
| Cuneus                                      | R    | 18  | -92 | -4  | 9.9          | <0.001                     | 2353                  |
| Inferior Occipital Gyrus                    | R    | 30  | -86 | -6  | 9.81         |                            |                       |
| Middle Occipital Gyrus                      | R    | 32  | -96 | 0   | 9.06         |                            |                       |
| Inferior Occipital Gyrus                    | R    | 40  | -82 | -8  | 7.72         |                            |                       |
| <i>Deactivation</i>                         |      |     |     |     |              |                            |                       |
| Superior Occipital Gyrus                    | R    | 38  | -84 | 28  | 5.01         | <0.001                     | 189                   |
| Middle Temporal Gyrus                       | R    | 50  | -76 | 14  | 4.83         |                            |                       |

| <b>Table S7: Difficult Onset vs Tapping MSIT</b> |      |     |     |     |              |                            |                       |
|--------------------------------------------------|------|-----|-----|-----|--------------|----------------------------|-----------------------|
| Label                                            | Side | x   | y   | z   | Peak T-value | Cluster p-value (FWE-corr) | Cluster size (voxels) |
| <i>Activation</i>                                |      |     |     |     |              |                            |                       |
| Inferior Occipital Gyrus                         | R    | 42  | -76 | -10 | 12.94        | <0.001                     | 58279                 |
| Lingual Gyrus                                    | L    | -20 | -92 | -12 | 12.07        |                            |                       |
| Dorsal Premotor Cortex                           | L    | -50 | 4   | 36  | 12.06        |                            |                       |
| Middle Occipital Gyrus                           | R    | 32  | -94 | -6  | 11.94        |                            |                       |
| <i>Deactivation</i>                              |      |     |     |     |              |                            |                       |
| Dorsal Lateral Prefrontal Cortex                 | R    | 22  | 36  | 52  | 6.37         | <0.001                     | 215                   |
|                                                  | R    | 12  | 36  | 48  | 4.33         |                            |                       |
| Dorsal Lateral Prefrontal Cortex                 | L    | -16 | 26  | 46  | 5.14         | <0.001                     | 269                   |
|                                                  | L    | -22 | 36  | 46  | 4.97         |                            |                       |
|                                                  | L    | -24 | 22  | 38  | 4.81         |                            |                       |
|                                                  | L    | -20 | 30  | 40  | 4.64         |                            |                       |
| Angular Gyrus                                    | L    | -44 | -68 | 30  | 4.87         | 0.003                      | 149                   |
|                                                  | L    | -56 | -68 | 30  | 4.8          |                            |                       |
|                                                  | L    | -44 | -56 | 26  | 4.07         |                            |                       |
|                                                  | L    | -54 | -62 | 36  | 3.64         |                            |                       |

| <b>Table S8: Easy Onset vs Tapping MSIT</b> |      |     |     |     |              |                            |                       |
|---------------------------------------------|------|-----|-----|-----|--------------|----------------------------|-----------------------|
| Label                                       | Side | x   | y   | z   | Peak T-value | Cluster p-value (FWE-corr) | Cluster size (voxels) |
| <i>Activation</i>                           |      |     |     |     |              |                            |                       |
| Lingual Gyrus                               | L    | -20 | -92 | -12 | 11.56        | <0.001                     | 11048                 |
| Inferior Occipital Gyrus                    | L    | -42 | -82 | -10 | 11.32        |                            |                       |
| Middle Occipital Gyrus                      | R    | 32  | -94 | -6  | 10.99        |                            |                       |
|                                             | L    | -26 | -92 | 0   | 10.62        |                            |                       |
| Intraparietal Sulcus                        | R    | 28  | -66 | 40  | 8.85         | <0.001                     | 2050                  |
|                                             | R    | 34  | -50 | 36  | 6.92         |                            |                       |
|                                             | R    | 34  | -58 | 46  | 6.34         |                            |                       |
|                                             | R    | 38  | -42 | 36  | 6.18         |                            |                       |
| Intraparietal Sulcus                        | L    | -46 | -40 | 46  | 7.55         | <0.001                     | 1542                  |
|                                             | L    | -24 | -64 | 36  | 7.42         |                            |                       |
|                                             | L    | -26 | -50 | 40  | 6.58         |                            |                       |

|                                     |     |     |     |     |      |        |     |
|-------------------------------------|-----|-----|-----|-----|------|--------|-----|
|                                     | L   | -40 | -42 | 38  | 6.37 |        |     |
| Cerebellum (Posterior Lobe)         | R   | 22  | -66 | -46 | 6.79 | 0.004  | 135 |
|                                     | R   | 30  | -70 | -50 | 5.18 |        |     |
|                                     | R   | 34  | -64 | -46 | 4.77 |        |     |
|                                     | R   | 20  | -74 | -50 | 4.46 |        |     |
| Dorsal Premotor Cortex              | R   | 44  | 20  | 26  | 6.19 | <0.001 | 938 |
|                                     | R   | 50  | 28  | 30  | 5.87 |        |     |
|                                     | R   | 48  | 12  | 20  | 5.1  |        |     |
|                                     | R   | 44  | 8   | 30  | 4.99 |        |     |
| Dorsal Premotor Cortex              | R   | 30  | 6   | 66  | 5.66 | <0.001 | 546 |
|                                     | R   | 30  | 10  | 48  | 4.77 |        |     |
|                                     | R   | 30  | -4  | 48  | 4.68 |        |     |
|                                     | R   | 26  | 10  | 60  | 4.63 |        |     |
| Orbitofrontal Gyrus                 | R   | 46  | 50  | -12 | 5.19 | <0.001 | 407 |
|                                     | R   | 22  | 60  | -12 | 4.71 |        |     |
|                                     | R   | 24  | 56  | -2  | 4.63 |        |     |
|                                     | R   | 20  | 42  | -22 | 4.59 |        |     |
| Dorsal Premotor Cortex              | L   | -50 | 6   | 28  | 5.15 | <0.001 | 417 |
|                                     | L   | -38 | 6   | 26  | 5.02 |        |     |
|                                     | L   | -56 | 10  | 34  | 4.66 |        |     |
|                                     | L   | -42 | 6   | 34  | 4.54 |        |     |
| Superior Frontal Gyrus              | R   | 4   | 16  | 48  | 5.06 | 0.008  | 119 |
|                                     | L   | -4  | 12  | 50  | 3.57 |        |     |
| Orbitofrontal Gyrus                 | L   | -36 | 56  | -14 | 4.94 | <0.001 | 479 |
| Ventral Lateral Prefrontal Cortex   | L   | -48 | 42  | 16  | 4.86 |        |     |
|                                     | L   | -44 | 50  | 8   | 4.83 |        |     |
|                                     | L   | -52 | 36  | 22  | 4.43 |        |     |
| Dorsal Prefrontal Cortex            | L   | -30 | -2  | 64  | 4.51 | 0.005  | 129 |
|                                     | L   | -26 | -6  | 72  | 4.1  |        |     |
| <i>Deactivation</i>                 |     |     |     |     |      |        |     |
| Medial Prefrontal Cortex            | L   | -6  | 56  | 6   | 5.69 | <0.001 | 824 |
|                                     | L   | -8  | 58  | 24  | 5.22 |        |     |
|                                     | L   | -16 | 54  | 28  | 5.12 |        |     |
|                                     | L   | -8  | 64  | 14  | 5.04 |        |     |
| Subgenual Anterior Cingulate Cortex | R   | 4   | 28  | -8  | 4.31 | 0.048  | 83  |
|                                     | R/L | 0   | 38  | -8  | 4.05 |        |     |
